# Supplementary material
Source: publisher site journal article supplement (https://www.dovepress.com/article/492834)

# Family Medicine Practice as Learning Environment: a Medical Student Evaluation in Switzerland

## Supplementary tables and figures

- **Table S1.** Students' evaluation results (2019-2022) on additional questions overall and by quality groups.
- **Table S2.** Students' evaluation results (2019-2022) on screening questions stratified by adult/pediatric family medicine practice (FMP) and by FMP urbanization area.
- **Table S3.** Students' evaluation results (2019-2022) on additional questions stratified by adult/pediatric family medicine practice (FMP) and by urbanization area of FMP residence.
- **Figure S1.** Copy of the original survey, mandatory for students, translated into English.
- **Figure S2.** Survey structure (Likert scale questions).
- **Figure S3.** Main tags used to describe students' perceptions and experiences.
- **Figure S4.** Location of medical student placements in family medicine practice, years 2019-2022.
- **Figure S5.** Cluster analysis of *benchmark* and *need to improve* groups.
- **Figure S6.** Violin plot of the total score (average by family medicine practice) by groups.
- **Figure S7.** Tag cloud of what could be improved about the placement.

**Table S1.** Students' evaluation results (2019-2022) on additional questions overall and by quality groups.

|                                                                                                         |      | Student level<br>713 | FMP <sup>a</sup> level<br>249 | Benchmark group<br>224(90%)<br>600 students | Need to improve<br>group<br>25(10%)<br>113 students | p      |
|---------------------------------------------------------------------------------------------------------|------|----------------------|-------------------------------|---------------------------------------------|-----------------------------------------------------|--------|
| 1. Organization                                                                                         |      | N(%)                 | Median[IQR]                   | Median[IQR]                                 | Median[IQR]                                         |        |
| The information on the course schedule on the Virtual Training Platform Medicine was sufficient         | Q6.1 |                      | 5.00[4.83, 5.50]              | 5.00[5.00, 5.50]                            | 4.67[4.12, 5.00]                                    | <0.001 |
| Disagree                                                                                                |      | N=710<br>19(2.7)     |                               | N=598<br>13(2.2)                            | N=112<br>6(5.4)                                     | 0.003  |
| Neutral                                                                                                 |      | 128(18.0)            |                               | 98(16.4)                                    | 30(26.8)                                            |        |
| Agree                                                                                                   |      | 563(79.3)            |                               | 487(81.4)                                   | 76(67.9)                                            |        |
| The information on the course schedule on the Virtual Training Platform Medicine was easy to understand | Q6.2 |                      | 5.00[4.82, 5.50]<br>N=247     | 5.17[5.00, 5.65]<br>N=222                   | 4.67[4.00, 5.00]                                    | <0.001 |
| Disagree                                                                                                |      | N=696<br>18(2.6)     |                               | N=585<br>12(2.1)                            | N=111<br>6(5.4)                                     | 0.005  |
| Neutral                                                                                                 |      | 116(16.7)            |                               | 89(15.2)                                    | 27(24.3)                                            |        |
| Agree                                                                                                   |      | 562(80.7)            |                               | 484(82.7)                                   | 78(70.3)                                            |        |
| The enrolment modalities for the course at the Virtual Training Platform Medicine were easy             | Q7.1 |                      | 5.00[4.50, 5.50]<br>N=246     | 5.00[4.50, 5.50]<br>N=221                   | 4.73[4.17, 5.00]                                    | 0.025  |
| Disagree                                                                                                |      | N=697<br>44(6.3)     |                               | N=587<br>31(5.3)                            | N=110<br>13(11.8)                                   | 0.035  |
| Neutral                                                                                                 |      | 155(22.2)            |                               | 132(22.5)                                   | 23(20.9)                                            |        |
| Agree                                                                                                   |      | 498(71.4)            |                               | 424(72.2)                                   | 74(67.3)                                            |        |
| The enrolment modalities for the course at the Virtual Training Platform Medicine were clear            | Q7.2 |                      | 5.00[4.67, 5.50]              | 5.00[4.69, 5.62]                            | 4.80[4.33, 5.00]                                    | 0.009  |
| Disagree                                                                                                |      | N=711<br>38(5.3)     |                               | N=598<br>27(4.5)                            | 11(9.7)                                             | 0.072  |
| Neutral                                                                                                 |      | 142(20.0)            |                               | 119(19.9)                                   | 23(20.4)                                            |        |
| Agree                                                                                                   |      | 531(74.7)            |                               | 452(75.6)                                   | 79(69.9)                                            |        |
| The individual and direct bilateral appointment with the teaching practice was uncomplicated            | Q8   |                      | 6.00[5.50, 6.00]              | 6.00[5.67, 6.00]                            | 5.00[4.75, 5.50]                                    | <0.001 |
| Disagree                                                                                                |      | 11(1.5)              |                               | 6(1.0)                                      | 5(4.4)                                              | <0.001 |
| Neutral                                                                                                 |      | 36(5.0)              |                               | 22(3.7)                                     | 14(12.4)                                            |        |
| Agree                                                                                                   |      | 666(93.4)            |                               | 572(95.3)                                   | 94(83.2)                                            |        |
| 2. Content                                                                                              |      |                      |                               |                                             |                                                     |        |
| I got experience with medical triages of urgencies                                                      | Q13  |                      | 4.50[4.00, 5.00]              | 4.50[4.00, 5.00]                            | 3.67[3.25, 4.00]                                    | <0.001 |
| Disagree                                                                                                |      | 73(10.2)             |                               | 44(7.3)                                     | 29(25.7)                                            | <0.001 |
| Neutral                                                                                                 |      | 284(39.8)            |                               | 238(39.7)                                   | 46(40.7)                                            |        |
| Agree                                                                                                   |      | 356(49.9)            |                               | 318(53.0)                                   | 38(33.6)                                            |        |
| 4. Patient                                                                                              |      |                      |                               |                                             |                                                     |        |
| I feel more confident in patient communication than before the training                                 | Q20  |                      | 5.00[4.33, 5.40]              | 5.00[4.50, 5.50]                            | 4.00[3.25, 4.22]                                    | <0.001 |
| Disagree                                                                                                |      | N=712<br>43(6.0)     |                               | 23(3.8)                                     | N=112<br>20(17.9)                                   | <0.001 |
| Neutral                                                                                                 |      | 194(27.2)            |                               | 149(24.8)                                   | 45(40.2)                                            |        |
| Agree                                                                                                   |      | 475(66.7)            |                               | 428(71.3)                                   | 47(42.0)                                            |        |

|                                                                                                    |       |                    |                           |                           |                          |        |
|----------------------------------------------------------------------------------------------------|-------|--------------------|---------------------------|---------------------------|--------------------------|--------|
| During the training, I was able to improve my medical competence in dealing with patients          | Q21   |                    | 5.00[4.50, 5.50]          | 5.00[4.68, 5.50]          | 4.00[3.33, 4.25]         | <0.001 |
| Disagree                                                                                           |       | N=712<br>43(6.0)   |                           | 19(3.2)                   | N=112<br>24(21.4)        | <0.001 |
| Neutral                                                                                            |       | 165(23.2)          |                           | 124(20.7)                 | 41(36.6)                 |        |
| Agree                                                                                              |       | 504(70.8)          |                           | 457(76.2)                 | 47(42.0)                 |        |
| 5. Skills                                                                                          |       |                    |                           |                           |                          |        |
| I could practice drawing blood <sup>b</sup>                                                        | Q24.1 |                    | 4.33[2.80, 5.50]<br>N=229 | 4.50[3.00, 5.50]<br>N=205 | 3.00[2.00, 4.18]<br>N=24 | 0.003  |
| Disagree                                                                                           |       | N=645<br>189(29.3) |                           | N=535<br>144(26.9)        | N=110<br>45(40.9)        | 0.003  |
| Neutral                                                                                            |       | 106(16.4)          |                           | 85(15.9)                  | 21(19.1)                 |        |
| Agree                                                                                              |       | 350(54.3)          |                           | 306(57.2)                 | 44(40.0)                 |        |
| I could practice vaccination                                                                       | Q24.2 |                    | 3.60[2.00, 5.00]<br>N=248 | 3.80[2.00, 5.33]<br>N=223 | 2.67[1.67, 4.00]         | 0.052  |
| Disagree                                                                                           |       | N=710<br>307(43.2) |                           | N=598<br>242(40.5)        | N=112<br>65(58.0)        | 0.001  |
| Neutral                                                                                            |       | 104(14.6)          |                           | 87(14.5)                  | 17(15.2)                 |        |
| Agree                                                                                              |       | 299(42.1)          |                           | 269(45.0)                 | 30(26.8)                 |        |
| I could practice <sup>b</sup> other activities <sup>c</sup>                                        | Q24.3 |                    | 3.00[2.00, 4.12]<br>N=227 | 3.00[2.00, 4.50]<br>N=203 | 2.19[1.25, 3.00]<br>N=24 | 0.010  |
| Disagree                                                                                           |       | N=643<br>293(45.6) |                           | N=533<br>228(42.8)        | N=110<br>65(59.1)        | 0.007  |
| Neutral                                                                                            |       | 180(28.0)          |                           | 158(29.6)                 | 22(20.0)                 |        |
| Agree                                                                                              |       | 170(26.4)          |                           | 147(27.6)                 | 23(20.9)                 |        |
| I had the opportunity to perform electrocardiograms on my own <sup>b</sup>                         | Q25   |                    | 2.20[1.00, 3.85]<br>N=220 | 2.25[1.00, 4.00]<br>N=197 | 1.91[1.00, 2.71]<br>N=23 | 0.121  |
| Disagree                                                                                           |       | N=617<br>361(58.5) |                           | N=509<br>294(57.8)        | N=108<br>67(62.0)        | 0.665  |
| Neutral                                                                                            |       | 107(17.3)          |                           | 91(17.9)                  | 16(14.8)                 |        |
| Agree                                                                                              |       | 149(24.1)          |                           | 124(24.4)                 | 25(23.1)                 |        |
| I feel safer than before the training in performing auscultation of heart/lung                     | Q26.1 |                    | 4.50[4.00, 5.00]          | 4.60[4.00, 5.00]          | 3.00[2.50, 3.67]         | <0.001 |
| Disagree                                                                                           |       | N=710<br>92(13.0)  |                           | N=598<br>48(8.0)          | N=112<br>44(39.3)        | <0.001 |
| Neutral                                                                                            |       | 246(34.6)          |                           | 207(34.6)                 | 39(34.8)                 |        |
| Agree                                                                                              |       | 372(52.4)          |                           | 343(57.4)                 | 29(25.9)                 |        |
| I feel safer than before the training in performing palpation of the abdomen                       | Q26.2 |                    | 4.25[3.50, 5.00]          | 4.50[3.88, 5.00]          | 2.88[2.00, 3.50]         | <0.001 |
| Disagree                                                                                           |       | N=711<br>125(17.6) |                           | N=599<br>74(12.4)         | N=112<br>51(45.5)        | <0.001 |
| Neutral                                                                                            |       | 240(33.8)          |                           | 205(34.2)                 | 35(31.2)                 |        |
| Agree                                                                                              |       | 346(48.7)          |                           | 320(53.4)                 | 26(23.2)                 |        |
| I feel safer than before the training in performing ascertainment of the joint status <sup>b</sup> | Q26.3 |                    | 4.00[3.00, 4.85]<br>N=228 | 4.00[3.00, 5.00]<br>N=204 | 2.75[2.00, 3.41]<br>N=24 | <0.001 |
| Disagree                                                                                           |       | N=643<br>149(23.2) |                           | N=533<br>95(17.8)         | N=110<br>54(49.1)        | <0.001 |
| Neutral                                                                                            |       | 271(42.1)          |                           | 233(43.7)                 | 38(34.5)                 |        |
| Agree                                                                                              |       | 223(34.7)          |                           | 205(38.5)                 | 18(16.4)                 |        |

|                                                                                             |       |                    |                           |                           |                          |        |
|---------------------------------------------------------------------------------------------|-------|--------------------|---------------------------|---------------------------|--------------------------|--------|
| I feel safer than before the training in performing ascertainment of the neuro status       | Q26.4 |                    | 3.67[2.67, 4.40]<br>N=229 | 3.80[3.00, 4.50]<br>N=205 | 2.39[1.82, 2.81]<br>N=24 | <0.001 |
| Disagree                                                                                    |       | N=643<br>198(30.8) |                           | N=533<br>137(25.7)        | N=110<br>61(55.5)        | <0.001 |
| Neutral                                                                                     |       | 254(39.5)          |                           | 225(42.2)                 | 29(26.4)                 |        |
| Agree                                                                                       |       | 191(29.7)          |                           | 171(32.1)                 | 20(18.2)                 |        |
| I feel safer than before the training in performing age-appropriate preventive check-up     | Q26.5 |                    | 3.50[2.00, 5.00]<br>N=204 | 3.50[2.00, 5.00]<br>N=182 | 2.61[2.00, 3.00]<br>N=22 | 0.010  |
| Disagree                                                                                    |       | N=451<br>174(38.6) |                           | N=370<br>129(34.9)        | N=81<br>45(55.6)         | 0.001  |
| Neutral                                                                                     |       | 112(24.8)          |                           | 92(24.9)                  | 20(24.7)                 |        |
| Agree                                                                                       |       | 165(36.6)          |                           | 149(40.3)                 | 16(19.8)                 |        |
| I feel more confident than before the training in assessing labor analysis <sup>b</sup>     | Q27.1 |                    | 4.60[4.00, 5.00]<br>N=229 | 4.75[4.00, 5.00]<br>N=205 | 3.57[3.00, 4.00]<br>N=24 | <0.001 |
| Disagree                                                                                    |       | N=645<br>64(9.9)   |                           | N=535<br>38(7.1)          | N=110<br>26(23.6)        | <0.001 |
| Neutral                                                                                     |       | 219(34.0)          |                           | 175(32.7)                 | 44(40.0)                 |        |
| Agree                                                                                       |       | 362(56.1)          |                           | 322(60.2)                 | 40(36.4)                 |        |
| I feel more confident than before the training in assessing X-ray images <sup>b</sup>       | Q27.2 |                    | 3.75[2.75, 4.50]<br>N=229 | 4.00[3.00, 4.75]<br>N=205 | 3.00[2.08, 3.50]<br>N=24 | 0.001  |
| Not satisfied                                                                               |       | N=643<br>180(28.0) |                           | N=533<br>127(23.8)        | N=110<br>53(48.2)        | <0.001 |
| Neutral                                                                                     |       | 253(39.3)          |                           | 219(41.1)                 | 34(30.9)                 |        |
| Satisfied                                                                                   |       | 210(32.7)          |                           | 187(35.1)                 | 23(20.9)                 |        |
| I feel more confident than before the training in assessing electrocardiograms <sup>b</sup> | Q27.3 |                    | 3.25[2.25, 4.00]<br>N=228 | 3.41[2.50, 4.20]<br>N=205 | 2.12[1.75, 3.00]<br>N=24 | <0.001 |
| Not satisfied                                                                               |       | N=641<br>211(32.9) |                           | N=531<br>154(29.0)        | N=110<br>57(51.8)        | <0.001 |
| Neutral                                                                                     |       | 280(43.7)          |                           | 243(45.8)                 | 37(33.6)                 |        |
| Satisfied                                                                                   |       | 150(23.4)          |                           | 134(25.2)                 | 16(14.5)                 |        |
| I feel more confident than before the training in assessing vaccination status              | Q27.4 |                    | 3.67[2.58, 4.75]<br>N=223 | 4.00[3.00, 5.00]<br>N=199 | 2.65[2.00, 3.27]<br>N=24 | <0.001 |
| Disagree                                                                                    |       | N=564<br>170(30.1) |                           | N=471<br>125(26.5)        | N=93<br>45(48.4)         | <0.001 |
| Neutral                                                                                     |       | 203(36.0)          |                           | 172(36.5)                 | 31(33.3)                 |        |
| Agree                                                                                       |       | 191(33.9)          |                           | 174(36.9)                 | 17(18.3)                 |        |
| The training has increased my motivation to work as a family doctor/physician later on      | Q30   | N(%)               | 4.50[3.94, 5.00]          | 4.50[4.00, 5.00]          | 3.00[2.62, 3.88]         | <0.001 |
| Disagree                                                                                    |       | N=710<br>99(13.9)  |                           | 61(10.2)                  | 38(33.9)                 | <0.001 |
| Neutral                                                                                     |       | 274(38.6)          |                           | 233(39.0)                 | 41(36.6)                 |        |
| Agree                                                                                       |       | 337(47.5)          |                           | 304(50.8)                 | 33(29.5)                 |        |

Family medicine practices in *benchmark* and *need to improve* groups were identified through k-means algorithm based on the screening questions and the number of students followed. At student level, scores were categorised as disagree (Likert scale 1-2); neutral (Likert scale 3-4); agree (Likert scale 5-6) and reported as number(percentage), N(%), with p-value(p) from chi-square test. At family practice level, median and interquartile range[IQR] of item average scores in Likert scale 1-6, were reported with p-value from Wilcoxon-Mann-Whitney-test.

<sup>a</sup> FMP: family medicine practice

<sup>b</sup> Pediatric practices were excluded.

<sup>c</sup> Apply or change bandages, etc.

**Table S2.** Students' evaluation results (2019-2022) on screening questions stratified by adult/pediatric family medicine practice (FMP) and by FMP urbanization area.

|                                                                                           |          | Adult            | Pediatric        | p     | Urban            | Suburban         | Rural            | p      |
|-------------------------------------------------------------------------------------------|----------|------------------|------------------|-------|------------------|------------------|------------------|--------|
|                                                                                           | FMP      | 229(92%)         | 20(8%)           |       | 136(55%)         | 103(41%)         | 10(4%)           |        |
|                                                                                           | Students | 647(91%)         | 66(9%)           |       | 469(66%)         | 227(32%)         | 15(2%)           |        |
| <b>1. Organisation</b>                                                                    |          |                  |                  |       |                  |                  |                  |        |
| Communication with the teaching practice was easy                                         | Q9       | 6.00[5.70, 6.00] | 6.00[5.65, 6.00] | 0.668 | 6.00[5.67, 6.00] | 6.00[6.00, 6.00] | 6.00[5.62, 6.00] | 0.066  |
| <b>2. Content</b>                                                                         |          |                  |                  |       |                  |                  |                  |        |
| The course gave me a realistic insight of the work in the FMP                             | Q10      | 6.00[5.50, 6.00] | 6.00[5.66, 6.00] | 0.955 | 6.00[5.49, 6.00] | 6.00[5.67, 6.00] | 6.00[5.81, 6.00] | 0.034  |
| I was introduced to the organization, set-up, workflows of a FMP                          | Q11      | 5.75[5.25, 6.00] | 5.71[5.50, 6.00] | 0.965 | 5.67[5.25, 6.00] | 6.00[5.50, 6.00] | 6.00[5.19, 6.00] | 0.027  |
| I experienced the core competencies <sup>a</sup> of family medicine                       | Q12      | 5.80[5.33, 6.00] | 5.90[5.45, 6.00] | 0.673 | 5.67[5.24, 6.00] | 6.00[5.42, 6.00] | 6.00[5.62, 6.00] | 0.022  |
| <b>3. Teacher</b>                                                                         |          |                  |                  |       |                  |                  |                  |        |
| My teaching physicians showed me many examinations                                        | Q14      | 5.50[5.00, 6.00] | 5.90[5.50, 6.00] | 0.023 | 5.50[5.00, 6.00] | 5.50[5.00, 6.00] | 5.38[5.00, 6.00] | 0.038  |
| My teaching physician checked and corrected my examination methods on the patient         | Q15      | 5.50[4.83, 6.00] | 5.88[5.19, 6.00] | 0.054 | 5.31[4.50, 6.00] | 5.50[5.00, 6.00] | 5.00[5.00, 5.69] | 0.009  |
| My teaching physician gave me the opportunity to examine patients on my own               | Q16      | 5.50[4.75, 6.00] | 5.88[5.00, 6.00] | 0.145 | 5.50[4.73, 6.00] | 5.67[5.00, 6.00] | 5.00[4.81, 5.88] | 0.220  |
| My teaching physician gave me regularly feedback                                          | Q17      | 5.00[4.25, 5.60] | 5.00[4.94, 5.62] | 0.671 | 5.00[4.25, 5.50] | 5.00[4.50, 6.00] | 5.00[4.25, 5.44] | 0.263  |
| My teaching physician became a role model for me through his way of dealing with patients | Q18      | 5.50[5.00, 6.00] | 5.88[5.38, 6.00] | 0.186 | 5.50[5.00, 6.00] | 5.67[5.00, 6.00] | 6.00[5.62, 6.00] | 0.034  |
| I have learned a lot in dealing with patients through my teaching physician               | Q19      | 5.67[5.00, 6.00] | 5.90[5.38, 6.00] | 0.243 | 5.50[5.00, 6.00] | 5.75[5.00, 6.00] | 6.00[5.62, 6.00] | 0.052  |
| <b>4. Patient</b>                                                                         |          |                  |                  |       |                  |                  |                  |        |
| I was made aware of social problems in the context of the patient visit                   | Q22      | 5.25[5.00, 6.00] | 5.03[4.94, 5.70] | 0.835 | 5.33[4.85, 5.62] | 5.00[5.00, 6.00] | 5.00[5.00, 5.50] | 0.636  |
| <b>5. Skills</b>                                                                          |          |                  |                  |       |                  |                  |                  |        |
| I could practice how to take a medical history                                            | Q23      | 5.00[4.00, 5.60] | 5.00[4.60, 5.75] | 0.494 | 5.00[4.00, 5.38] | 5.00[4.00, 6.00] | 4.75[4.06, 5.00] | 0.102  |
| How satisfied are you with the course in the teaching practice?                           | Q28      | 5.80[5.25, 6.00] | 6.00[5.69, 6.00] | 0.212 | 5.75[5.00, 6.00] | 6.00[5.37, 6.00] | 6.00[6.00, 6.00] | 0.019  |
| How satisfied are you with your teaching physician?                                       | Q29      | 6.00[5.50, 6.00] | 6.00[5.79, 6.00] | 0.292 | 6.00[5.33, 6.00] | 6.00[5.75, 6.00] | 6.00[6.00, 6.00] | 0.014  |
| Number of student followed (2019-2022)                                                    |          | 2.00[1.00, 4.00] | 2.00[1.00, 4.00] | 0.894 | 3.00[2.00, 4.00] | 2.00[1.00, 3.00] | 1.00[1.00, 1.75] | <0.001 |

Groups were defined by FMP area of residence, with the degree of urbanization for Switzerland defined according to the 2011 Eurostat classification of degree of urbanization. Median and interquartile range[IQR] were reported for each question. P-value (p) from Wilcoxon-Mann-Whitney-test / Kruskal-Wallis-test of median comparison between the groups was reported for each question.

<sup>a</sup> Prevention and counseling, acute treatments, chronic illness care, guide function / coordination with the health care system.

**Table S3.** Students' evaluation results (2019-2022) on additional questions stratified by adult/pediatric family medicine practice (FMP) and by urbanization area of FMP residence.

|                                                                                                         |          | Adult                     | Pediatric        | p     | Urban                                  | Suburban                              | Rural                         | p     |
|---------------------------------------------------------------------------------------------------------|----------|---------------------------|------------------|-------|----------------------------------------|---------------------------------------|-------------------------------|-------|
|                                                                                                         | FMP      | 229(92%)                  | 20(8%)           |       | 136(55%)                               | 103(41%)                              | 10(4%)                        |       |
|                                                                                                         | Students | 647(91%)                  | 66(9%)           |       | 469(66%)                               | 227(32%)                              | 15(2%)                        |       |
| <b>1. Organization</b>                                                                                  |          |                           |                  |       |                                        |                                       |                               |       |
| The information on the course schedule on the Virtual Training Platform Medicine was sufficient         | Q6.1     | 5.00[4.83, 5.50]          | 5.18[4.88, 5.58] | 0.789 | 5.03[4.60, 5.50]                       | 5.00[5.00, 5.67]                      | 5.00[5.00, 5.00]              | 0.378 |
| The information on the course schedule on the Virtual Training Platform Medicine was easy to understand | Q6.2     | 5.00[4.83, 5.50]          | 5.29[4.69, 5.53] | 0.951 | 5.21[4.74, 5.50]                       | 5.00[5.00, 5.67]<br>N=102             | 5.00[4.75, 5.00] N=9          | 0.136 |
| The enrolment modalities for the course at the Virtual Training Platform Medicine were easy             | Q7.1     | 5.00[4.50, 5.50]          | 5.12[4.91, 5.62] | 0.265 | 5.00[4.50, 5.50]                       | 5.00[4.50, 5.50]<br>N=101             | 5.00[4.50, 5.00] N=9          | 0.479 |
| The enrolment modalities for the course at the Virtual Training Platform Medicine were clear            | Q7.2     | 5.00[4.67, 5.50]          | 5.00[4.87, 5.50] | 0.931 | 5.00[4.57, 5.50]                       | 5.00[5.00, 5.67]                      | 5.00[4.50, 5.00]              | 0.117 |
| The individual and direct bilateral appointment with the teaching practice was uncomplicated            | Q8       | 6.00[5.50, 6.00]          | 6.00[5.59, 6.00] | 0.974 | 6.00[5.50, 6.00]                       | 6.00[5.60, 6.00]                      | 6.00[5.50, 6.00]              | 0.345 |
| <b>2. Content</b>                                                                                       |          |                           |                  |       |                                        |                                       |                               |       |
| I got experience with medical triages of urgencies                                                      | Q13      | 4.50[3.86, 5.00]          | 5.00[4.36, 5.28] | 0.018 | 4.37[3.86, 5.00]                       | 4.50[4.00, 5.00]                      | 5.00[4.81, 5.00]              | 0.126 |
| <b>4. Patient</b>                                                                                       |          |                           |                  |       |                                        |                                       |                               |       |
| I feel more confident in patient communication than before the training                                 | Q20      | 5.00[4.22, 5.33]          | 5.21[4.92, 5.69] | 0.098 | 5.00[4.11, 5.25]                       | 5.00[4.50, 5.88]                      | 5.00[4.25, 5.00]              | 0.007 |
| During the training, I was able to improve my medical competence in dealing with patients               | Q21      | 5.00[4.50, 5.50]          | 5.08[4.92, 5.50] | 0.341 | 5.00[4.33, 5.50]                       | 5.00[4.62, 5.67]                      | 5.00[4.81, 5.75]              | 0.102 |
| <b>5. Skills</b>                                                                                        |          |                           |                  |       |                                        |                                       |                               |       |
| I could practice drawing blood                                                                          | Q24.1    | 4.33[2.80, 5.50]          | 1.79[1.00, 3.62] | 0.001 | 4.33[3.00, 5.50] <sup>a</sup><br>N=124 | 4.50[2.58, 6.00] <sup>a</sup><br>N=95 | 4.00[1.00, 4.44] <sup>a</sup> | 0.285 |
| I could practice vaccination                                                                            | Q24.2    | 3.50[2.00, 5.00]<br>N=228 | 4.25[1.00, 5.62] | 0.632 | 3.65[2.19, 5.33]                       | 3.70[2.00, 5.00]<br>N=102             | 1.75[1.00, 3.75]              | 0.118 |

|                                                                                         |       |                           |                          |        |                                        |                                       |                                      |        |
|-----------------------------------------------------------------------------------------|-------|---------------------------|--------------------------|--------|----------------------------------------|---------------------------------------|--------------------------------------|--------|
| I could practice other skills <sup>b</sup>                                              | Q24.3 | 3.00[2.00, 4.12]<br>N=227 | 2.17[1.50, 2.70]         | 0.039  | 2.69[2.00, 3.95] <sup>a</sup><br>N=122 | 3.40[2.00, 5.00] <sup>a</sup><br>N=95 | 1.75[1.00, 3.88] <sup>a</sup>        | 0.031  |
| I had the opportunity to perform electrocardiograms on my own                           | Q25   | 2.20[1.00, 3.85]<br>N=220 | 1.00[1.00, 1.21]<br>N=15 | 0.001  | 2.00[1.00, 3.50] <sup>a</sup><br>N=122 | 2.50[1.00, 4.00] <sup>a</sup><br>N=89 | 1.25[1.00, 4.50] <sup>a</sup><br>N=9 | 0.365  |
| I feel safer than before the training in performing auscultation of heart/lung          | Q26.1 | 4.50[4.00, 5.00]          | 5.00[4.40, 5.10]         | 0.075  | 4.33[3.50, 5.00]                       | 4.75[4.00, 5.00]                      | 4.38[3.62, 5.00]                     | 0.003  |
| I feel safer than before the training in performing palpation of the abdomen            | Q26.2 | 4.25[3.50, 5.00]          | 5.00[3.71, 5.31]         | 0.299  | 4.00[3.38, 5.00]                       | 4.50[4.00, 5.00]                      | 4.38[4.00, 5.00]                     | 0.158  |
| I feel safer than before the training in performing ascertainment of the joint status   | Q26.3 | 4.00[3.00, 4.85]<br>N=228 | 2.57[2.00, 3.08]         | <0.001 | 3.50[3.00, 4.50] <sup>a</sup><br>N=123 | 4.00[3.42, 5.00] <sup>a</sup><br>N=95 | 4.00[3.62, 4.75] <sup>a</sup>        | 0.012  |
| I feel safer than before the training in performing ascertainment of the neuro status   | Q26.4 | 3.67[2.67, 4.40]          | 2.50[2.00, 3.20]         | 0.015  | 3.50[2.64, 4.00]<br>N=124              | 4.00[3.00, 4.50]<br>N=95              | 3.62[3.12, 4.00]                     | 0.025  |
| I feel safer than before the training in performing age-appropriate preventive check-up | Q26.5 | 3.00[2.00, 4.67]<br>N=185 | 5.67[5.00, 6.00]<br>N=19 | <0.001 | 3.00[2.00, 4.00]<br>N=114              | 4.00[2.71, 5.00]<br>N=83              | 3.50[2.38, 5.00] N=7                 | 0.008  |
| I feel more confident than before the training in assessing labor analysis              | Q27.1 | 4.60[4.00, 5.00]          | 3.50[3.00, 4.00]         | <0.001 | 4.40[4.00, 5.00] <sup>a</sup><br>N=124 | 5.00[4.00, 5.00] <sup>a</sup><br>N=95 | 4.50[4.00, 5.00] <sup>a</sup>        | 0.033  |
| I feel more confident than before the training in assessing X-ray images                | Q27.2 | 3.75[2.75, 4.50]          | 2.00[1.88, 3.00]         | <0.001 | 3.50[2.50, 4.22] <sup>a</sup><br>N=124 | 4.00[3.00, 5.00] <sup>a</sup><br>N=95 | 4.38[3.62, 5.00] <sup>a</sup>        | 0.021  |
| I feel more confident than before the training in assessing electrocardiograms          | Q27.3 | 3.25[2.25, 4.00]<br>N=228 | 1.75[1.15, 2.25]         | <0.001 | 3.08[2.38, 4.00] <sup>a</sup><br>N=124 | 3.45[2.00, 4.33] <sup>a</sup><br>N=94 | 3.75[3.06, 4.00] <sup>a</sup>        | 0.422  |
| I feel more confident than before the training in assessing vaccination status          | Q27.4 | 3.50[2.50, 4.54]<br>N=204 | 5.00[4.17, 5.88]<br>N=19 | <0.001 | 3.50[2.51, 4.50]<br>N=126              | 4.00[2.71, 5.00]<br>N=90              | 3.25[2.00, 4.50] N=7                 | 0.097  |
| The training has increased my motivation to work as a family doctor/physician later on  | Q30   | 4.50[3.88, 5.00]          | 4.45[4.00, 5.06]         | 0.445  | 4.04[3.65, 4.67]                       | 4.80[4.00, 5.00]                      | 5.12[5.00, 5.88]                     | <0.001 |

Groups were defined according to the degree of urbanization for Switzerland, Eurostat degree of urbanization classification 2011. Median and interquartile range[IQR] were reported for each question. P-value(p) from Wilcoxon-Mann-Whitney-test / Kruskal-Wallis-test of median comparison between the groups was reported for each question.

<sup>a</sup> Pediatric practices were excluded.

<sup>b</sup> Apply or change bandages, etc.

Figure S1. Copy of the original survey, mandatory for students, translated into English.

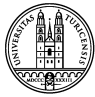

Universität  
Zürich<sup>UZH</sup>

Placement in Primary Care Academic year 20\_\_ / 20\_\_

Teaching Evaluation - Institute of Primary Care Zürich

Dear students

This survey is for the evaluation of the One-to-One Training in Family Medicine. The aim of this evaluation is to show the quality and effectiveness of the course and to obtain direct feedback on the practices involved. The data is not collected anonymously to enable a follow-up quality improvement process but it is confidential: only selected members in the institute could access to your personal data. In case of future studies, the information will only be used in ways that will not reveal who you are and any personal information that could reasonably identify you will be removed or changed before files are shared with other researchers or results are made public. We kindly ask you to fill the questionnaire as honestly and openly as possible.

Thank you very much for your collaboration!

\* 1. Personal data

Surname   
Name

\* 2. Academic year

Autumn semester until/with the following spring semester

Year

\* 3. Data protection: I agree that my teaching doctor may receive a copy of the evaluation (upon request).

Yes

No

\* 4. Data of the Family Medicine Teaching Practice

Surname   
Name   
Address



Placement in Primary Care Academic year 20\_\_ / 20\_\_

## Organisation

\* 5. The commute to the practice was reasonable

Yes

No

Please specify

\* 6. The information on the course schedule on the Virtual Training Platform Medicine was

1 = Strongly disagree    2    3    4    5    6 = Strongly agree

Sufficient

Easy to understand

Please specify

\* 7. The enrolment modalities for the course at the Virtual Training Platform Medicine were

1 = Strongly disagree    2    3    4    5    6 = Strongly agree

Easy

Clear

Please specify

\* 8. The individual and direct bilateral appointment with the teaching practice was

1 = Strongly disagree 2 3 4 5 6 = Strongly agree

Uncomplicated

Please specify

\* 9. Communication with the teaching practice was

1 = Strongly disagree 2 3 4 5 6 = Strongly agree

Easy

Please specify







Placement in Primary Care Academic year 20\_\_ / 20\_\_

Student / Patient - Interaction

\* 20. I feel more confident in patient communication than before the training

1 = Strongly disagree

2

3

4

5

6 = Strongly agree

\* 21. During the training, I was able to improve my medical competence in dealing with patients

1 = Strongly disagree

2

3

4

5

6 = Strongly agree

\* 22. I was made aware of social problems in the context of the patient visit

1 = Strongly disagree

2

3

4

5

6 = Strongly agree





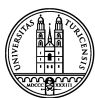

Placement in Primary Care Academic year 20\_\_ / 20\_\_

## Overall assessment

\* 28. How satisfied are you with the course in the teaching practice?

1 = Not at all satisfied    2    3    4    5    6 = Very satisfied

|                       |                       |                       |                       |                       |                       |
|-----------------------|-----------------------|-----------------------|-----------------------|-----------------------|-----------------------|
| <input type="radio"/> |
|-----------------------|-----------------------|-----------------------|-----------------------|-----------------------|-----------------------|

Comments

\* 29. How satisfied are you with your teaching physician?

1 = Not at all satisfied    2    3    4    5    6 = Very satisfied

|                       |                       |                       |                       |                       |                       |
|-----------------------|-----------------------|-----------------------|-----------------------|-----------------------|-----------------------|
| <input type="radio"/> |
|-----------------------|-----------------------|-----------------------|-----------------------|-----------------------|-----------------------|

Comments

\* 30. The training has increased my motivation to work as a family doctor/physician later on

1 = Strongly disagree    2    3    4    5    6 = Strongly agree

|                       |                       |                       |                       |                       |                       |
|-----------------------|-----------------------|-----------------------|-----------------------|-----------------------|-----------------------|
| <input type="radio"/> |
|-----------------------|-----------------------|-----------------------|-----------------------|-----------------------|-----------------------|

Comments

31. What did you like most about the training?

32. What did you benefit the most from placement?

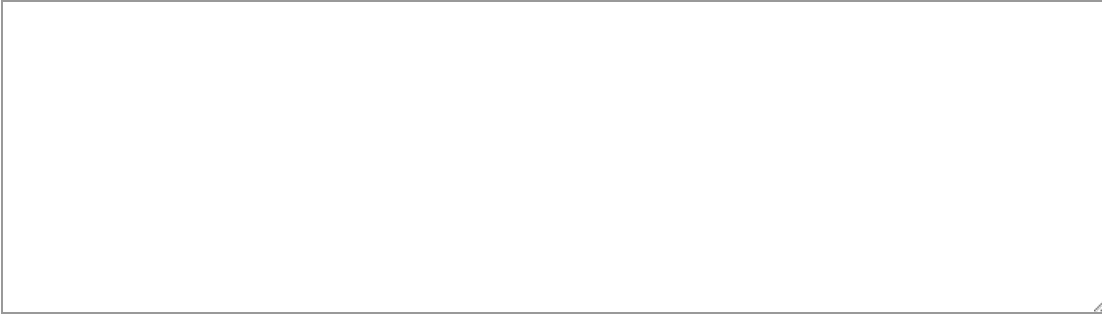

33. What can be improved in the course?



**Figure S2. Survey structure (Likert scale questions).** Dimensions were the six themes investigated. Screening referred to the key questions for identifying practitioners by teaching quality and additional denoted the other questions. Each item was labeled as Q followed by the number in the original item list. A short item description was provided. Abbreviations: ECG, electrocardiogram; info, information, examin., examinations, abd., abdominal. Emergency meant medical urgencies. See Figure S1.

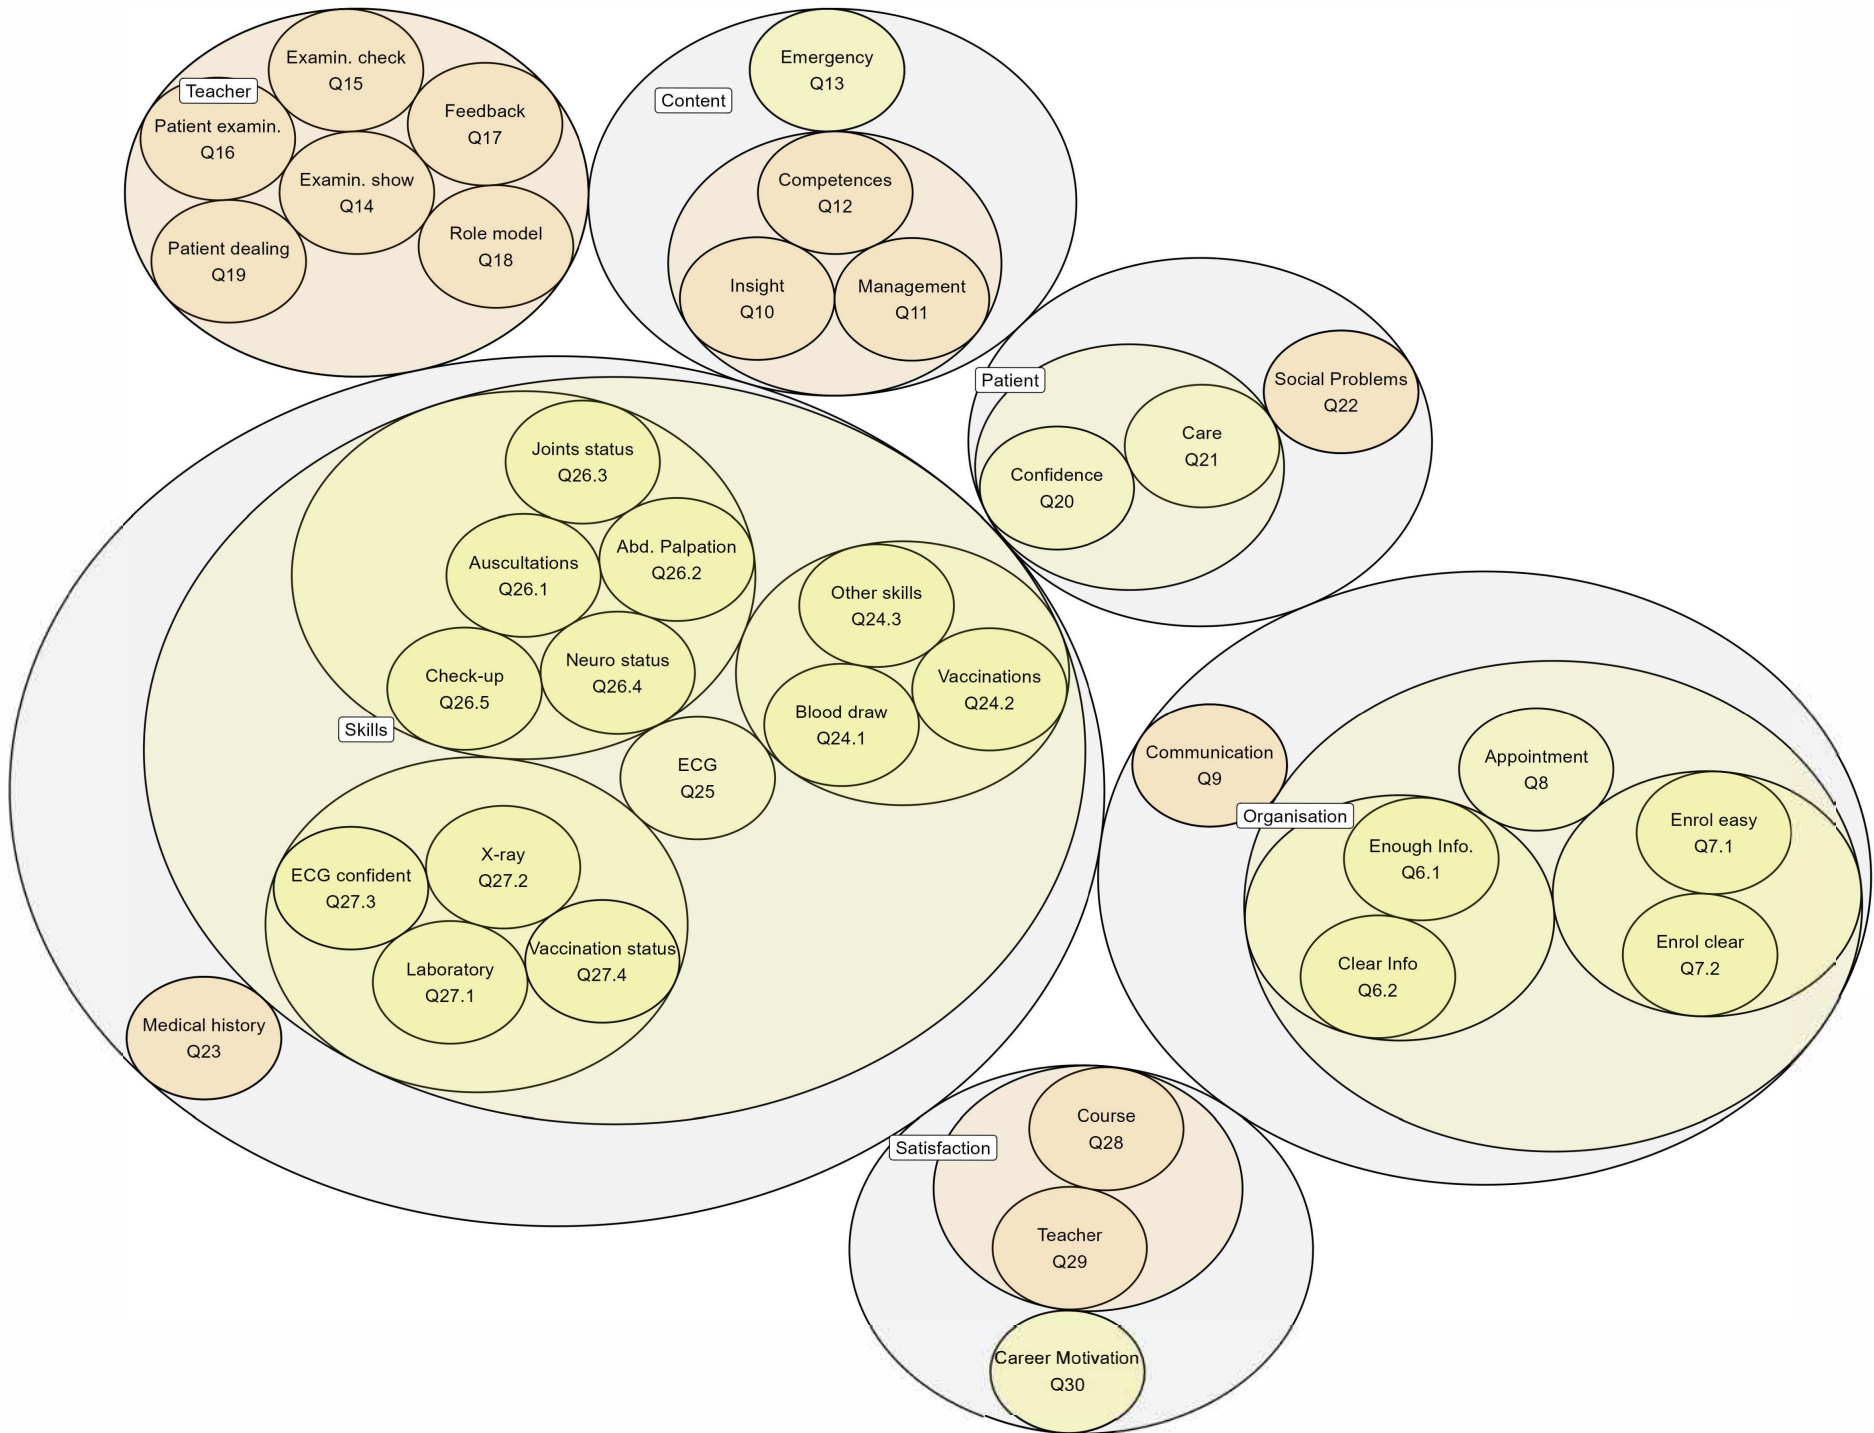

Dimension  
 Additional  
 Screening

**Figure S3. Main tags used to describe students' perceptions and experiences.**

Each tag, first column, was used when the student, evaluating the experience with each subject, second column, acknowledged at least one of the characteristics reported in the third column.

| Tag                       | Subject evaluated         | Characteristics reported / Applicability                                                                                                                                                                                                                                                                                                                                                                                                                                                                                                        |
|---------------------------|---------------------------|-------------------------------------------------------------------------------------------------------------------------------------------------------------------------------------------------------------------------------------------------------------------------------------------------------------------------------------------------------------------------------------------------------------------------------------------------------------------------------------------------------------------------------------------------|
| Good Teacher              | Teaching doctor           | <ul style="list-style-type: none"> <li>enthusiasm/commitment to teaching;</li> <li>ability to give constructive feedback;</li> <li>ability to ensure protected time for teaching;</li> <li>awareness of ethical standards relating to teaching;</li> <li>methods of assessment made clear to students;</li> <li>willing to reflect/act on student feedback;</li> <li>evidence of competent communication skills;</li> <li>willing to take responsibility for teaching schedule;</li> <li>aware of curriculum/objectives of teaching.</li> </ul> |
| No good teaching          | Teaching doctor           | <ul style="list-style-type: none"> <li>evidence of serious lack or no satisfaction in one of the characteristics for a good teacher;</li> <li>evidence of lack or problems in more than one characteristics for a good teacher.</li> </ul>                                                                                                                                                                                                                                                                                                      |
| Good insight              | Family Medicine Practice  | <ul style="list-style-type: none"> <li>making learners feel welcomed by the practice;</li> <li>demonstrating effective team working;</li> <li>demonstrating adequate standard of record keeping;</li> <li>taking into account learning objectives;</li> <li>enthusiasm to teach within the practice as a whole.</li> </ul>                                                                                                                                                                                                                      |
| Skills Gained             | Learning content          | <ul style="list-style-type: none"> <li>wide range of clinical experience, including work of non-doctor team members.</li> </ul>                                                                                                                                                                                                                                                                                                                                                                                                                 |
| Good Patient Mix          | Patient                   | <ul style="list-style-type: none"> <li>encountering of different type of patients;</li> <li>encountering of patients with chronic or multi-morbid conditions.</li> </ul>                                                                                                                                                                                                                                                                                                                                                                        |
| Good patient relationship | Patient – Teaching doctor | <ul style="list-style-type: none"> <li>good and safe interaction with patients, direct or indirect through the family medicine doctor.</li> </ul>                                                                                                                                                                                                                                                                                                                                                                                               |

**Figure S4. Location of medical student placements in family medicine practice, years 2019-2022.** For each practice municipality, the number of student was reported. The 26 Swiss regions (cantons) were delimited with borders.

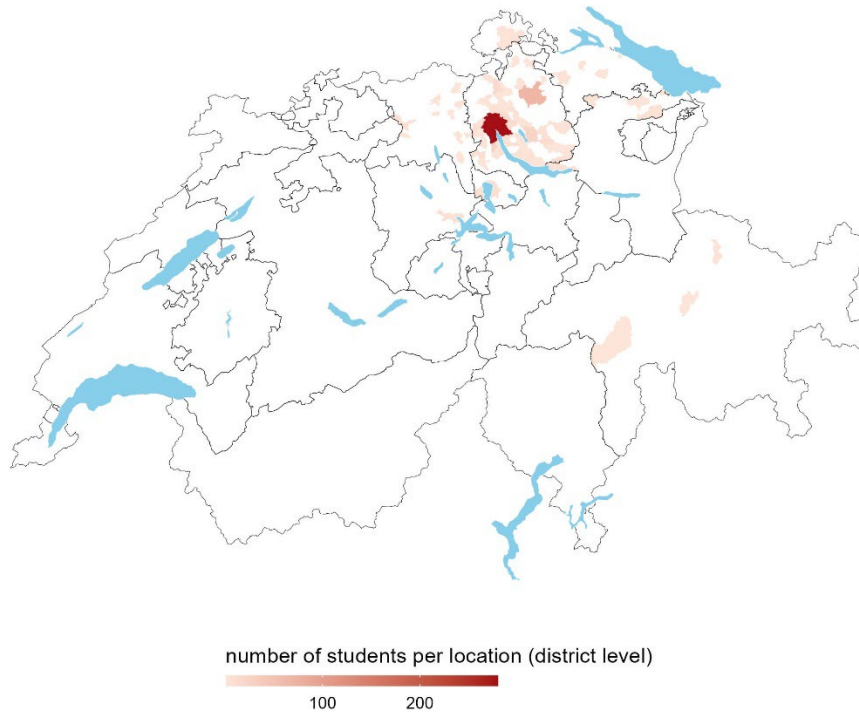

**Figure S5. Cluster analysis of *benchmark* and *need to improve* groups.** The number of cluster was  $k=3$ , and then the two close clusters were put together in the benchmark group. The screening questions and the number of student per general practice defined a 15-dimensional dataset that was represented through the first two principal components (Dim1, Dim2) using Principal Component Analysis (PCA) methods.

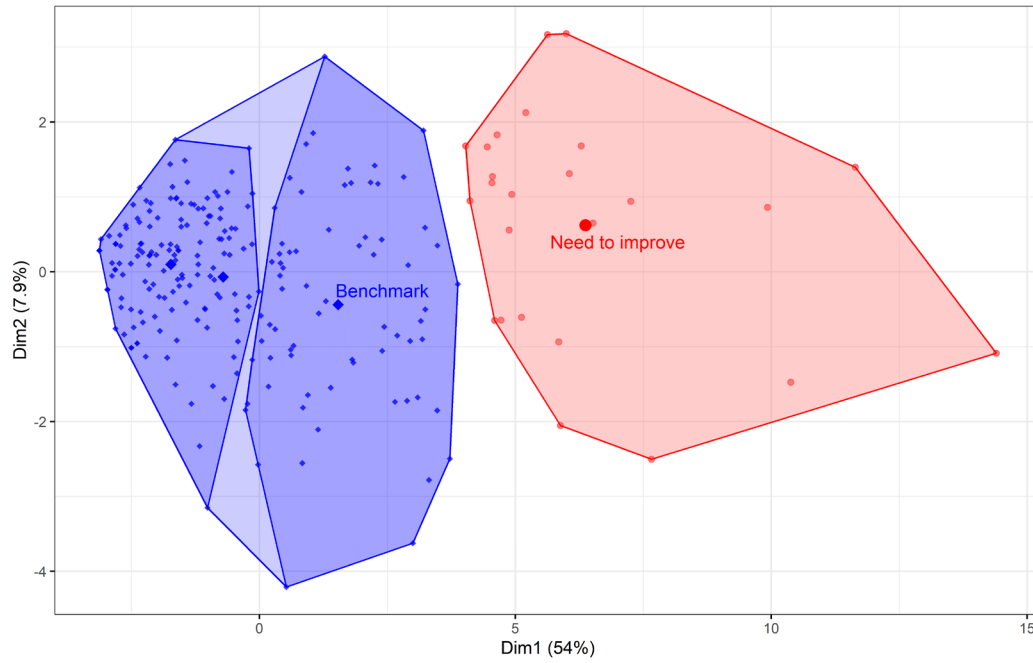

**Figure S6. Violin plot of the total score (average by family medicine practice) by groups.** The total score was calculated as the sum score of the screening questions and reported by *benchmark* and *need to improve* groups. Horizontal lines within the two “violins” represented the 75%, 50% and 25% quantiles of each group distribution. Horizontal dashed line represented the overall 20% quantile (all the distribution).

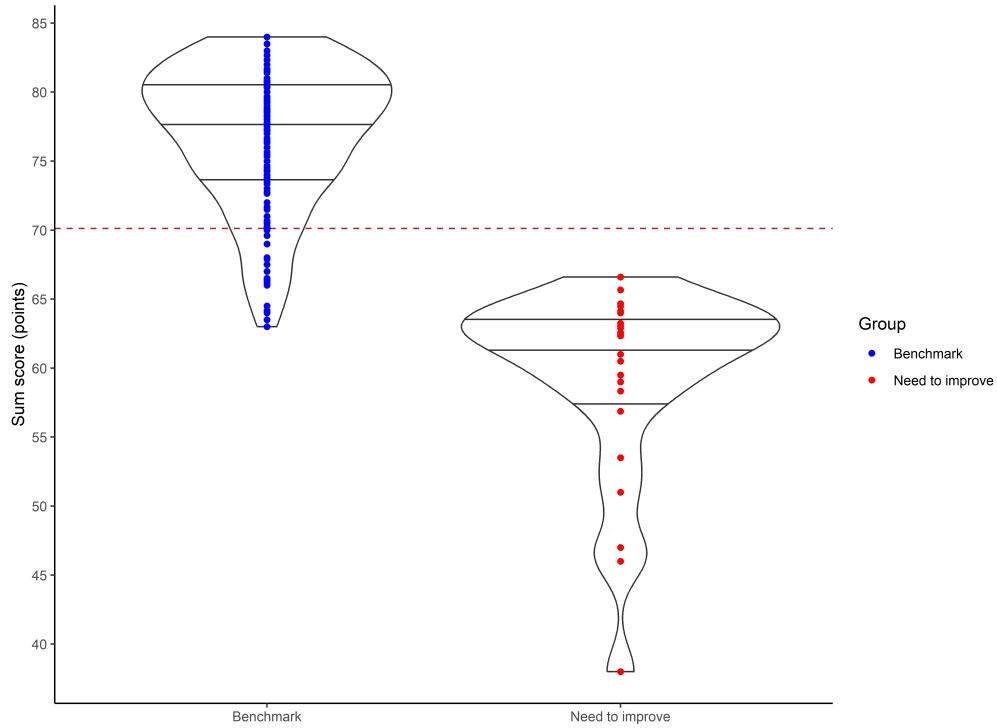

**Figure S7. Tag cloud of what could be improved about the placement.** Tags assigned from the answers to the question Q33: “What can be improved in the course?” For each tag, the percentage of all 713 students, was reported, though only 281 students answered the open-ended question.

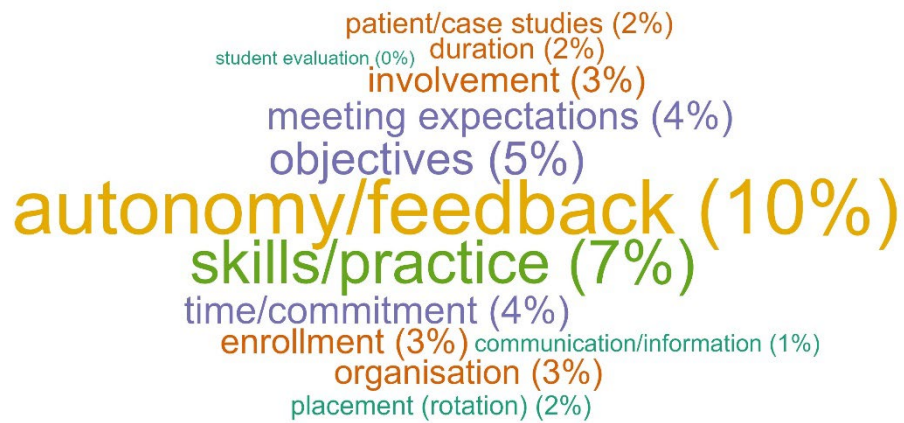

Supplement: Supplementary file 1 [file get_supplementary_file.php]
